# Psychological Stress and the Onset of IDDM in Children

## A case-control study

GUNILLA M. THERNLUND, MD  
GISELA DAHLQUIST, MD  
KJELL HANSSON, PHD  
STEN A. IVARSSON, MD

JOHNNY LUDVIGSSON, MD  
STURE SJÖBLAD, MD  
BRUNO HÄGGLÖF, MD

**OBJECTIVE** — The purpose of the study was to determine whether psychosocial stress during different life periods could be a risk factor in the etiology/pathogenesis of insulin-dependent diabetes mellitus (IDDM) in children.

**RESEARCH DESIGN AND METHODS** — In a population-based sample of 67 case patients 0–14 years of age and 61 matched healthy control subjects, life events during the entire lifespan before the onset of IDDM were recorded as well as measures of child behavior before onset, social support, and family function.

**RESULTS** — Negative life events occurring during the first 2 years of life, life events with difficult adaptation, child behavioral deviances, and a more chaotic family function were more common in the case group. A stepwise logistic regression indicated that negative life events in the first 2 years increased the risk of IDDM and that premorbid child behavior as well as dysfunctional hierarchical family pattern affect the risk.

**CONCLUSIONS** — Stress early in life may increase the risk for IDDM, presumably by affecting the autoimmune process. To confirm these results, it is necessary to make a truly prospective study.

The theory of the etiology of insulin-dependent diabetes mellitus (IDDM) proposed in recent years is that IDDM is caused by an autoimmune de-

struction of the  $\beta$ -cells in genetically predisposed individuals (1). The majority of IDDM patients carry specific human leukocyte antigen (HLA) haplotypes in the

From the Department of Child and Adolescent Psychiatry (G.M.T., K.H.) and the Department of Pediatrics, General Hospital of Malmö (S.A.I.), University of Lund; the Departments of Pediatrics and Epidemiology and Public Health (G.D.) and Child and Adolescent Psychiatry (B.H.), University of Umeå; the Department of Pediatrics (J.L.), University Hospital of Linköping; and the Department of Pediatrics (S.S.), University Hospital of Lund, Sweden.

Address correspondence and reprint requests to Gunilla Thernlund, MD, Department of Child and Youth Psychiatry, Box 638, 220 09 Lund, Sweden.

Received for publication 17 October 1994 and accepted in revised form 29 June 1995.

CRS, Clinical Rating Scale; HLA, human leukocyte antigen; IDDM, insulin-dependent diabetes mellitus; ISSI, Interview Schedule of Social Interaction.

major histocompatibility complex region of chromosome 6, whereas other HLA haplotypes are associated with a reduced risk for IDDM (2,3). Because the concordance rate of IDDM among monozygotic twins is only ~30% (4) and the risk of an HLA-identical sibling of an IDDM patient is also only 30% (5,6), environmental factors must play a crucial role. Researchers have proposed viruses (7), dietary habits (8–11), and toxic agents (12) as possible environmental factors.

The association between psychological stress and the onset of IDDM was suggested as early as 1679 by Willis (13), followed by several more recent studies (14–16). These findings have been both contradicted and criticized on methodological grounds (17,18). More recent studies, using standardized measures of life events with control groups, have shown an increased number of life events before the onset of IDDM in adults (19,20). Support for these results was given by animal studies (21,22). In a comparatively large and truly population-based incident case-control study, Hägglöf et al. (23) found that the total number of life events was the same for diabetic and control children. When more qualitative aspects were included by separately analyzing severe events experienced by children, such as actual or threatened losses within the family, such events turned out to be significant risk determinants for IDDM with onset between 5 and 9 years of age. However, in this study, only life events occurring during the last year were recorded. Robinson and Fuller (24) have shown that patients with newly diagnosed diabetes had more severe life events than siblings and neighborhood control subjects during a 3-year period before onset. The same group also showed an association between islet cell antibodies and severe life events (25). A limitation of these studies was that they consisted of very small samples.

Three different time periods of importance in the etiology/pathogenesis of IDDM have been discussed: 1) when the

Table 1—Demographic characteristics of the studied populations

| Variable                                                              | Case group  | Control group |
|-----------------------------------------------------------------------|-------------|---------------|
| n                                                                     | 67          | 61            |
| Age (years)                                                           | 8.37 ± 3.95 | 8.23 ± 4.00   |
| Gender (%)                                                            |             |               |
| Boys                                                                  | 49          | 46            |
| Girls                                                                 | 51          | 54            |
| Socioeconomic status (%)                                              |             |               |
| University education and/or higher white-collar occupation            |             |               |
| Mothers                                                               | 18          | 24            |
| Fathers                                                               | 23          | 40            |
| High school and/or lower white-collar occupation                      |             |               |
| Mothers                                                               | 38          | 44            |
| Fathers                                                               | 30          | 26            |
| No further education after ordinary school and blue-collar occupation |             |               |
| Mothers                                                               | 44          | 33            |
| Fathers                                                               | 47          | 34            |

Age data are means ± SD.

body learns to distinguish its own proteins from foreign proteins, at ~0–24 months of age (26,27); 2) when the autoimmune reaction starts, often many years before manifest disease, indicating a period up to 8 years before clinical onset of IDDM depending also on the child's age (28); 3) the time close to the clinical onset of IDDM, when stress may be a triggering factor, indicating the period up to 12 months before the clinical onset of the disease (20). To date mainly the last hypothesis has been discussed.

Besides measurement of life events, stress can be implied in other ways, such as behavioral deviances in children, which can be seen as unspecified indications of stress. The effect of life stress can be moderated by several factors. The vast field of social support research emphasizes the protective aspects of being integrated in a supportive social network (29). The family is of the utmost importance, especially for children. A good social network and a good family function should therefore serve as a protection against negative influences of life stress. A lack of social support and a dysfunctional family, on the other hand, may also be possible sources of stress.

In the present study we compared a group of children who had recent onset of IDDM with an age-matched control group for psychosocial stress factors, such as life events, behavior symptoms, family factors, and parental social network. We offer the following hypotheses. 1) In the case group, we should find more life stress during the first period of life, 0–24 months, if stress influenced the immunological development. 2) In the case group, we should find more life stress during the entire period of life, 0–14 years, if stress influenced the autoimmune process. 3) In the case group, we should find more life stress during the last year before the clinical onset of the disease if stress acted as a triggering factor. 4) If a good social network and family function is protected against the negative aspects of life stress, we should find that these factors decrease the risk in a multivariate statistical model.

## RESEARCH DESIGN AND METHODS

### Subjects

Children <15 years old, in whom IDDM had been diagnosed during 1988 and

1989 at five pediatric clinics in different geographic areas in Sweden, were invited to take part in the study. The patients should represent the total population of IDDM in these areas because at the time of the study the pediatric clinics covered all cases occurring in the region. Of a total of 82 case patients, 2 were excluded because of mental retardation and another was excluded because of onset of IDDM when the patient was abroad on vacation. Of the remaining 79 subjects, 67 (85%) agreed to participate in the family interview. For each diabetic family who took part in the study, a control child of the same sex and nearest in age attending the proband's class or day care center was invited to participate as a crude match for social status. Of the assigned 67 control subjects, 61 (91%) agreed to participate. Demographic variables of the samples are presented in Table 1. All case patients and control subjects were Caucasians. There was no difference in age and sex distribution between the dropouts and those who participated in the study. The socioeconomic status could not be evaluated. The study was described in more detail by Hägglöf et al. (30).

### Design

About 2 months after the diagnosis of IDDM, an interview was held with the family. The interviewers had been co-trained in the methods used. In each study center, the same interviewer was used for case patients and control subjects. The interview covered life events, parental and child social support, child behavior, and a videotaped family task. The researchers also had access to social and medical data. The study was approved by the local ethics committees, and informed consent was obtained from all parents and children of relevant ages.

**Life events.** The parents were interviewed about life events during the whole lifespan of the child. A form based on Coddington's original questionnaire (32,33) and translated into Swedish by Hurme was used (23,34). For each event, the date was measured as carefully as pos-

sible on a monthly basis by comparing it to other important events in the child's and family's life such as beginning nursery school or preschool, grade in school, etc. To measure the appraisal of the event, the interviewer asked whether the child had experienced it as positive or negative on a five-point scale. By scoring the ease or difficulty of the adjustment on a four-point scale, an estimation of adaptation difficulties was made. Negative events were supposed to measure the appraisal of the event, and events with difficult adjustment were supposed to measure how the child actually adapted to the event. Because many of the children were young and the questionnaire covered the entire lifespan, we had to rely on the parents' opinion of how the event had affected the child to maintain consistency in the method. If the parents disagreed about the impact of a special event, we accepted the mother's opinion. The items asked for are shown in Table 2.

The life event questionnaire was evaluated in a 6-year follow-up study of a normal population of 193 children by Höök et al. (35). It showed that both the total life event load and a measure of adjustment difficulty made significant contributions to the prediction of child disturbance at the follow-up investigation. As in the study of Höök et al., items measuring positive events and conflicts were omitted. The positive events were not considered to be operationally defined well enough and conflicts were excluded because items in the child behavior questionnaire covering peer conflicts and family conflicts were integrated in the measure of family function. Besides, the conflict items in the life event questionnaire were shown to have a low reliability.

Obviously, a disadvantage with using the parents as informants is that parental factors influence the assessment. In the study by Höök et al. (35), mothers regularly regarded it more negative if the fathers remarried than if they themselves did so. Thus, we thought it was important to add a more objective way to determine whether an event was negative. There-

**Table 2—Items in the life-event questionnaire**

|                                          |                                                 |
|------------------------------------------|-------------------------------------------------|
| Family composition and living conditions |                                                 |
| 1.                                       | Birth of a brother or sister                    |
| 2.                                       | Addition of a third adult to the family         |
| 3.                                       | Brother or sister leaving home                  |
| 4.                                       | Separation of the parents*                      |
| 5.                                       | Divorce of parents                              |
| 6.                                       | The family changes apartment/house†             |
| 7.                                       | The family moves to another place†              |
| 8.                                       | Jail sentence of a parent*                      |
| 9.                                       | Mother married to a stepparent*                 |
| 10.                                      | Father married to a stepparent*                 |
| 11.                                      | Discovery of being an adopted child*            |
| Child care and occupation of parents     |                                                 |
| 12.                                      | Beginning nursery school or family day care     |
| 13.                                      | Changing nursery school or family day care†     |
| 14.                                      | Beginning the preschool year                    |
| 15.                                      | Mother beginning to work                        |
| 16.                                      | Father beginning to work                        |
| 17.                                      | Loss of job by a parent                         |
| 18.                                      | Financial status of parents markedly reduced    |
| 19.                                      | Job of parent requiring more absence from home  |
| Serious illness or injury                |                                                 |
| 20.                                      | Serious illness or injury of the mother*        |
| 21.                                      | Hospitalization of the mother*                  |
| 22.                                      | Serious illness or injury of the father*        |
| 23.                                      | Hospitalization of the father*                  |
| 24.                                      | Serious illness or injury of the child*         |
| 25.                                      | Hospitalization of the child*                   |
| 26.                                      | Hospitalization of a brother or sister*         |
| Deaths                                   |                                                 |
| 27.                                      | Death of the mother*                            |
| 28.                                      | Death of the father*                            |
| 29.                                      | Death of a brother or sister*                   |
| 30.                                      | Death of a grandparent*                         |
| 31.                                      | Death of a close friend to the child*           |
| Schooling                                |                                                 |
| 32.                                      | Beginning first year of compulsory education    |
| 33.                                      | Change to a new school†                         |
| 34.                                      | Failure of a year in school*                    |
| 35.                                      | Beginning seventh grade of compulsory education |
| Sexuality                                |                                                 |
| 36.                                      | Breaking up with a girl- or boyfriend*          |
| 37.                                      | Menarche                                        |
| 38.                                      | Unmarried pregnancy*                            |
| 39.                                      | Fathering an unmarried pregnancy*               |
| 40.                                      | Abortion*                                       |

\*Negative event. †Negative when occurring more than twice.

fore, 27 events covered by the questionnaire that were defined as negative by earlier researchers were regarded as always negative (35). To this number, all neutral events that the child had experienced as negative or very negative were added. The following variables were calculated: 1) the total number of life events; 2) the number of negative events; and 3) the number of life events causing difficult or very difficult adjustment.

**Measures of child behavior.** The parents were interviewed about the child's normal behavior according to a symptom list, which encompasses 51 operationally defined behaviors. This interview focused on the behavior during the last year and before any signs of IDDM symptoms. The questionnaire is shown to have good validity and reliability, with internal consistency ranging from 0.81 to 0.85 and an average score about four times as high ( $P < 0.001$ ) in a clinical group as in a normal group (36). The interviews were audiotaped, and a sample was evaluated by all interviewers. The inter-rater reliability varied between 0.92 and 0.99. The youngest children in the study were excluded because the questionnaire did not fit them. Seven diabetic and eight control children are thus missing. The symptoms were summed up into four factors (inhibition, acting-out, asocial, and anxiety) and a total score (36). Internal consistency for the combined case and control group was 0.64.

**Measures of family function.** A videotaped family task was evaluated blindly by a group of trained raters (none was an interviewer): 1) all family members individually were asked to answer four questions regarding the family and afterwards discuss these and agree upon one answer for the entire family; 2) each family member was asked to state one positive and one negative opinion about the family; 3) the whole family was asked to participate in laying a puzzle, which was very difficult. There were 6 diabetic families and 1 control family that refused to be videotaped, and 11 tapes had to be excluded for technical reasons (7 diabetic and 4

control families). All together, 54 diabetic families and 56 control families were evaluated. We found no differences regarding age and sex between those who were videotaped and the other subjects.

The rating scales used were the Clinical Rating Scale–Turbo (CRS), Family Competence, and Family Style. The CRS was developed by Olson (37,38), building on his circumplex model and then revised by Gustafsson et al. (39). It is composed of three scales called Adaptability, Cohesion, and Hierarchical Organization (40). Adaptability and Cohesion are curvilinear dimensions. Adaptability measures family function dimension with the extremes rigidity and chaos, and Cohesion has the extremes enmeshment and disengagement. Hierarchical Organization is linear; a high value is negative. The CRS has been shown to predict metabolic control in adolescents with IDDM (39). The validity of CRS was estimated by its ability to differentiate between normal families and families with an identified psychiatric patient (41).

All raters received extensive training in these scales. The raters worked in pairs and made one individual and one consensus rating for each family. The inter-rater reliability was 0.93 for Family Competence, 0.81 for Family Style, 0.83 for Adaptability, 0.79 for Cohesion, and 0.87 for Hierarchical Organization.

**Socioeconomic status.** The official Swedish classification was used regarding parents' occupation. The parents were divided into three groups: 1) university education and/or higher white-collar occupation; 2) high school and/or lower white-collar occupation; and 3) no further education after ordinary school and blue-collar occupation.

**Parental social support.** The Interview Schedule of Social Interaction (ISSI) was chosen due to its good theoretical foundation. It measures both availability and adequacy of social integration and attachment. The ISSI was originally developed by Henderson et al. (42). The original studies with the ISSI showed good internal consistency and reliability and both

main and buffering effects on the development of neurosis. It has been translated into Swedish and revised by Undén and Orth-Gomér (43) into a self-report questionnaire, which is shown to have a good correlation with the long version. The original version of the instrument is shown to have a good test-retest stability (42). Thernlund and Samuelsson (44) found a lower test-retest stability for the revised version in a group of parents compared with a group of professionals (0.45–0.87). We have used the total score. High scores are equal to good social support. The internal consistency of the ISSI, measured by Cronbach's  $\alpha$ , in the combined case and control group was 0.87.

#### Statistical analysis

The Mann-Whitney *U* test and Student's *t* test were used to compare the variables in the case and control groups. A logistic regression analysis was performed with IDDM status (yes/no) as the dependent variable. The stress factors were divided into those thought to be of importance for 1) the first 2 years of life (life event variables), 2) the intervening period (life event variables from year 2 up to the last year before the clinical diagnosis), and 3) the last year before the clinical onset of IDDM (life event variables and child behavior). Family function and network factors were also included as possible moderators of stress. All factors included in the model were used as continuous variables. The contribution of each variable was tested in stepwise modeling.

**RESULTS**— All psychosocial measures for case groups were compared with those of the control group. The mean values and SD for the different variables in the case and control groups are shown in Table 3. There were no significant differences in socioeconomic grouping or family composition between the case patients and control subjects, nor were there any differences in social support for parents. The ISSI values did not differ from those of other normal populations (44).

**Life events.** The control group in this study had life event scores similar to those of another Swedish normal group (35). When looking at the total number of life events and events defined as negative, a statistically significant difference between case patients and control subjects was seen only when negative events occurred during the child's first 2 years of life. When a qualitative aspect of the child's adaptation difficulty was introduced with an event, there were significant differences for the entire lifespan as well as for the first 2-year period (Table 3).

**Child behavior.** The child behavior scores were within the range of normal levels compared with other Swedish studies for both the case and control groups (36). However, there were significantly more behavioral problems in the case group compared with the control group (Table 3).

**Family function.** The family function scores in the control subjects did not differ from those of other control groups in Sweden (41). There was no difference in the proportions of high rigidity, enmeshment, disengagement, or hierarchical organization among the groups, but there were significantly more families classified as chaotic in the case group (Table 3).

**Risk determinants for IDDM.** The psychosocial measures, which were unevenly distributed between the case and control groups, might be risk determinants for IDDM. Negative life events during the first 2 years of life, life events with difficult adjustment during the first 2 years of life, life events with difficult adjustment during the whole life, a high score of behavior problems, and a high score of family chaos were more common in the case group; these factors might thus be risk determinants.

In a stepwise logistic regression of all life event variables together with child behavior as an unspecified indicator of stress, family function, and social support, which could be stressors or moderators of stress, three variables—negative life events during the first 2 years of life, behavior problems (acting-out), and dys-

Table 3—Psychosocial variables

| Variable                              | Case group    | Control group | P value |
|---------------------------------------|---------------|---------------|---------|
| Life events—first 2 years             |               |               |         |
| All life events                       | 2.28 ± 1.90   | 1.89 ± 1.59   | 0.265   |
| Negative life events                  | 0.75 ± 1.20   | 0.41 ± 0.92   | 0.039   |
| Life events with difficult adaptation | 0.25 ± 0.84   | 0.02 ± 0.13   | 0.022   |
| Life events—intervening period        |               |               |         |
| All life events                       | 10.90 ± 6.69  | 11.11 ± 5.90  | 0.565   |
| Negative life events                  | 5.15 ± 4.17   | 4.87 ± 3.42   | 0.983   |
| Life events with difficult adaptation | 1.81 ± 2.15   | 1.05 ± 1.37   | 0.018   |
| Life events during the last year      |               |               |         |
| All life events                       | 1.07 ± 1.45   | 1.00 ± 1.05   | 0.672   |
| Negative life events                  | 0.44 ± 0.84   | 0.34 ± 0.52   | 0.994   |
| Life events with difficult adaptation | 0.13 ± 0.52   | 0.00 ± 0.00   | 0.112   |
| Child behavior                        |               |               |         |
| Inhibition                            | 6.67 ± 12.94  | 3.00 ± 5.82   | 0.021   |
| Acting-out                            | 11.08 ± 13.75 | 5.00 ± 8.28   | 0.004   |
| Asocial                               | 2.08 ± 6.26   | 1.27 ± 5.11   | 0.214   |
| Anxiety                               | 9.55 ± 10.64  | 13.25 ± 18.84 | 0.735   |
| Total score                           | 53.25 ± 44.71 | 35.27 ± 27.17 | 0.013   |
| Family organization                   | 1.31 ± 1.45   | 0.80 ± 1.10   | 0.076   |
| Family cohesion                       | 13.67 ± 3.69  | 14.38 ± 2.67  | 0.229   |
| Family adaptability                   | 15.63 ± 2.94  | 14.63 ± 2.39  | 0.027   |
| ISSI                                  |               |               |         |
| Fathers                               | 22.86 ± 5.64  | 22.38 ± 4.86  | 0.339   |
| Mothers                               | 23.02 ± 5.79  | 23.02 ± 6.10  | 0.923   |

Data are means ± SD.

functional hierarchical organization—stood out in a significant model (Table 4).

**CONCLUSIONS**— Most researchers have studied the influence of life stress as precipitating the onset of IDDM, suggested to be due to stress-induced increase in peripheral insulin need (19,20,23), whereas our study focused on life stress occurring during the entire life period. We found no increase in life events the year before onset, but negative and difficult life events occurring during the first 2 years of life differed significantly between case patients and control subjects. Life events with difficult adjustment during the entire life also differed significantly between the case group and the control group. We introduced other measures that may be signs of life stress. A high behavior score before onset of IDDM symptoms and high family chaos in-

creased the risk for IDDM. Psychological stress may play a more etiological role, e.g., by affecting the immunopathogenic  $\beta$ -cell destruction starting long before the clinical onset of the disease (1). Such an explanation is supported by the many indications of interaction between psychological stress and the immune system (45–47) and the results of studies on animal models of autoimmune diabetes (21,22). Robinson et al. (25), who examined a 3-year period before the onset of

IDDM, have found associations between severe life events and islet cell antibodies.

Both quantitative and qualitative life events may be associated with the overall social status, family composition, and social support of parents and children. Because there were no significant differences regarding socioeconomic status, family composition, and social support between the groups, this could not explain the difference between the groups. The result of the logistic regression showed that of all potential risk factors, negative events the first 2 years of life increased the risk for IDDM almost twofold. The risk was also affected by the hierarchical organization of the family and by acting-out behavior at the time of onset of the disease. Whether family function was a moderator of stress or a stress factor cannot be differentiated by this study design.

The most obvious methodological problem with a case-control design is the risk of disease-dependent biases, i.e., that diseased children and their parents may recall and/or act differently after the onset of a disease than they did before, whereas the control subjects would act normally. The nature of the study also made it necessary to inform the participants of the aim of the research, i.e., study how psychosocial factors influence the course of the disease and how the disease affects the child and the family. It was impossible to keep the interviewers blind to the participants' IDDM or control status. Paykel (31) has discussed the reliability and fall-off with different methods and found that an interview could give more reliable answers, especially if the event was thor-

Table 4—Results of the stepwise logistic regression of life events and psychosocial factors with IDDM status as the dependent variable

| Psychosocial factors | Variable                         | P value | Odds ratio |
|----------------------|----------------------------------|---------|------------|
| Life event           | Negative event the first 2 years | 0.030   | 1.94       |
| Child behavior       | Acting-out                       | 0.022   | 1.05       |
| Family function      | Hierarchical organization        | 0.026   | 1.52       |

Model  $\chi^2$  test 19.85;  $P = 0.0002$ .

oughly timed by comparing it with other family factors. Severe negative life events such as a divorce, an accident, a severe disease, or the death of a family member and the approximate timing in the child's life (the last year before onset of IDDM or before the age of 2 years) would most probably be recorded similarly among case and control families by a skilled interviewer, whereas less severe or positive events might be biased. The recollection of the adaptive behavior of the child at the time of the event might be subjectively overestimated by a parent of a newly diseased child. The fact that there was no difference in the recollection of events the year before onset may imply that recall bias did not play an important role. A limitation of the life event scale is that it does not take into consideration the context of the situation of the individual and the family when the life event occurred.

There is also a possibility that the behavior problems may be a correlate to prodromal symptoms of the disease. The fact that more case patients had a chaotic family function may be an effect of a crisis reaction, even though 2 months had passed and the metabolic control of the child was normalized. The onset of IDDM is associated with a steep rise in anxiety that for the majority of patients fades within a couple of weeks (30). Many parents had a high level of distress at the end of the 1st year (30), in accordance with the report of Kovacs et al. (48), who found that 25% of the mothers (but not the fathers) were depressed during the 1st year. Only a prospective population-based cohort study examining both potential case patients and control subjects in a healthy state would overcome the problems of possible disease-dependent biases.

In conclusion, the present study indicates that negative life events occurring during the first 2 years of life may be a risk determinant for childhood-onset IDDM and that premorbid child behavior as well as dysfunctional hierarchical family pattern affect the risk. We found no

clear-cut evidence supporting the precipitating hypothesis.

**Acknowledgments**— This study was supported by Swedish Medical Research Council Project 09949 and Swedish Council for Social Research Project 90-0723 and by grants from the Medical Faculty of the Universities of Lund and Umeå, the Swedish Diabetes Association, and the Child Diabetes Foundation.

Jerker Ringström, MSc, Clinical Data Care, Lund, Sweden, gave valuable advice on the statistical methods.

**References**

1. Bottazzo GF, Pujol-Borrell R, Gale E: Etiology of diabetes: the role of autoimmune mechanisms. In *The Diabetes Annual*. Alberti KG, Krall LP, Eds. Amsterdam, Elsevier/North Holland, 1985, p. 16-52
2. Nepom GT: A unified hypothesis for the complex genetics of HLA associations with IDDM. *Diabetes* 39:1153-1157, 1990
3. Owerbach D, Hägglöf B, Lernmark Å, Holmgren G: Susceptibility to insulin-dependent diabetes defined by restriction enzyme polymorphism of HLA-D region genomic DNA. *Diabetes* 33:958-965, 1984
4. Kaprio J, Toumiletho J, Koskenouvo M, Romanov K, Reunanen A, Eriksson J, Stengård J, Kesäniemi YA: Concordance for type 1 (insulin-dependent) and type 2 (non-insulin-dependent) diabetes mellitus in population-based cohort of twins in Finland. *Diabetologia* 35:1060-1067, 1992
5. Gorsuch AN, Spencer KM, Lister J, Wolf E, Bottazzo GF, Cudworth AG: Can future diabetes be predicted? A study of affected children. *Diabetes* 31:862-866, 1982
6. Descamps J, Boitard C, Hors J, Busson M, Marcelli-Barge A, Mogenet A, Robert J-J: Life-table analysis of the risk of type 1 (insulin-dependent) diabetes in siblings according to islet cell antibodies and HLA markers: a 8-year prospective study. *Diabetologia* 35:951-957, 1992
7. Notkins AL, Yoon J-W: Virus-induced diabetes mellitus. In *Concepts in Viral Pathogenesis*. Notkins AL, Oldstone MBA, Eds.

- New York, Springer, 1984, p. 241-247
8. Borch-Johnsen K, Joner G, Mandrup-Poulsen T, Christy M, Zachau-Christiansen B, Kastrup K, Nerup J: Relation between breast-feeding and incidence rates of insulin-dependent diabetes mellitus: a hypothesis. *Lancet* ii:1083-1086, 1984
9. Dahlquist G, Blom L, Persson L-Å, Sandström A, Wall S: Indications of nutritional risk determinants for diabetes in children. *Br Med J* 300:1302-1306, 1990
10. Karjalainen J, Martin JM, Knip M, Ilonen J, Robinson B, Savilahti E, Åkerblom H, Dosch HH: A bovine albumin peptide as a possible trigger of insulin-dependent diabetes mellitus. *N Engl J Med* 327:302-307, 1992
11. Helgason T, Ewen SW, Ross IS, Stowers JM: Diabetes produced in mice by smoked/cured mutton. *Lancet* ii:1017-1022, 1982
12. Toniolo A, Onodera T, Yoon J-W, Notkins AL: Induction of diabetes by cumulative environmental insulinitis from viruses and chemicals. *Nature* 288:383-385, 1980
13. Willis T: *Pharmaceutice Rationalis: Sive Diatriba de Medicamentorum Operationibus in Humano Corpore*. Oxford, U.K., Theatr. Sheldon, 1674
14. Hinkle LEE, Evans FM, Wolf S, Conger G, Edwards PJ, Pugh BL: Studies in diabetes mellitus. IV. Life history of three persons with relatively mild stable diabetes and relation of significant experiences in their life to the onset and course of the disease. *Psychosom Med* 13:184-202, 1951
15. Danowski TS: Emotional stress as a cause of diabetes mellitus. *Diabetes* 12:183-184, 1965
16. Stein SP, Charles ES: Emotional factors in juvenile diabetes: a study of the early life experience of eight diabetic children. *Psychosom Med* 37:237-244, 1975
17. Johnson SB: Psychosocial factors in juvenile diabetes: a review. *J Behav Med* 3:95-116, 1980
18. Surwit RS, Schneider MS, Feinglos MN: Stress and diabetes mellitus. *Diabetes Care* 15:1413-1422, 1992
19. Kisch ES: Stressful events and the onset of diabetes mellitus. *Isr J Med Sci* 21:356-358, 1985

Downloaded from http://ada.lww.com/ by guest on 17 April 2024

20. Vialettes B, Ozanon JP, Kaplansky S, Farnarier C, Sauvaget E, Lassman-Vague V, Vague P: Stress antecedents and immune status in recently diagnosed type 1 (insulin-dependent) diabetes mellitus. *Diabetes Metab* 15:45–50, 1989
21. Carter WR, Herrman J, Stokes K, Cox DJ: Promotion of diabetes onset by stress in the BB rat. *Diabetologia* 30:674–675, 1987
22. Mazelis AG, Albert D, Crisa C, Fiore H, Parasam D, Franklin B: Relationship of stressful housing conditions to the onset of diabetes mellitus induced by multiple, sub-diabetogenic doses of streptozotocin. *Diabetes Res* 6:195–200, 1987
23. Hägglöf B, Blom L, Dahlquist G, Lönnberg G, Sahlin B: The Swedish childhood diabetes study: indications of severe stress as a risk factor for IDDM. *Diabetologia* 34: 579–583, 1991
24. Robinson N, Fuller JH: Role of life events and difficulties in the onset of diabetes mellitus. *J Psychosom Res* 29:583–591, 1985
25. Robinson N, Lloyd C, Fuller JH, Yateman N: Psychosocial factors and the onset of type 1 diabetes. *Diabetic Med* 6:53–58, 1988
26. Rothenberg EV: The development of functionally responsive T-cells. *Adv Immunol* 51:85–214, 1992
27. Strobel S: Dietary manipulation and induction of tolerance. *J Pediatr* 121:874–879, 1992
28. Gorsuch AN, Spencer KM, Lister J, McNally JM, Dean BM, Bottazzo GF, Cudworth AG: Evidence for a long prediabetic period in type 1 (insulin-dependent) diabetes mellitus in children. *Lancet* ii:1363–1365, 1981
29. Cohen S, Syme SL (Eds.): *Social Support and Health*. New York, Academic Press, 1985
30. Hägglöf B, Fransson P, Lernmark B, Thernlund G: Psychosocial aspects of type 1 diabetes mellitus in children 0–14 years of age. *Arctic Med Res* 53:20–29, 1994
31. Paykel ES: Methodological aspects of life event research. *J Psychosom Res* 27:341–352, 1983
32. Coddington RD: The significance of life events as etiologic factors in the diseases of children. I. A survey of professional workers. *J Psychosom Res* 16:7–18, 1972
33. Coddington RD: The significance of life events as etiologic factors in the diseases of children. II. A study of a normal population. *J Psychosom Res* 16:205–213, 1972
34. Hurme H: Life changes of children: occurrence (in Swedish). *Socialmed Tidsskr* 60:246–253, 1983
35. Höök B, Hägglöf B, Thernlund G: Life events and behavioural deviances in childhood: a longitudinal study of a normal population. *Eur J Child Adolesc Psychiatry*. In press
36. Cederblad M, Höök B: *Revision and Evaluation of an Instrument Measuring Children's Behaviour Deviances*. Stockholm, Institute for Stress Research, Karolinska Institute, 1984
37. Olson DH, Russell CS, Russell DS: Circumplex model of marital and family systems. I. Cohesion and adaptability dimensions, family types and clinical applications. *Fam Pract* 22:69–83, 1979
38. Olson DH, Killorin E: *Clinical Rating Scales for the Circumplex Model of Marital and Family Systems*. Minneapolis, Family Social Science, University of Minnesota, 1980
39. Gustafsson PA, Cederblad M, Ludvigsson J, Lundin B: Family interaction and metabolic balance in juvenile diabetes mellitus: a prospective study. *Diabetes Res Clin Pract* 4:7–14, 1987
40. Thomas V, Olson DH: Problem families and the circumplex model: observational assessment using the clinical rating scale (CRS). *J Marital Fam Ther* 19:159–175, 1993
41. Hansson K: *Family Diagnosis* (in Swedish). Lund, Sweden, University of Lund, 1989
42. Henderson S, Byrne DG, Duncan-Jones P: *Neurosis and the Social Environment*. Sydney, Academic Press, 1981
43. Undén A-L, Orth-Gomér K: Development of a social support instrument for use in population surveys. *Soc Sci Med* 29:1387–1392, 1989
44. Thernlund G, Samuelsson M: Parental social support and child behaviour problems in different populations and socioeconomic groups. *Soc Sci Med* 36:353–360, 1993
45. Khansari DN, Murgu AJ, Faith RE: Effects of stress on the immune system. *Immunol Today* 11:170–174, 1990
46. Bateman A, Singh A, Kral T, Solomon S: The immune-hypothalamic-pituitary adrenal axis. *Endocr Rev* 10:92–112, 1989
47. Weiss JM, Sundar SK, Becker KJ, Cierpal MA: Behavioural and neural influences on cellular immune responses: effects of stress and interleukin-1. *J Clin Psychiatry* 50:43–58, 1989
48. Kovacs M, Finkelstein R, Feinberg TL: Initial psychological responses of parents to the diagnosis of IDDM in their children. *Diabetes Care* 8:568–574, 1985
